# Supplementary material for: Using Carbon Paste Electrode Modified with Ion Imprinted Polymer and MWCNT for Electrochemical Quantification of Methylmercury in Natural Water Samples
Source: MDPI journal article supplement (doi:10.3390/bios12060376), 2022-05-30
Supplement: s1 [file s1]

## Supplementary Materials

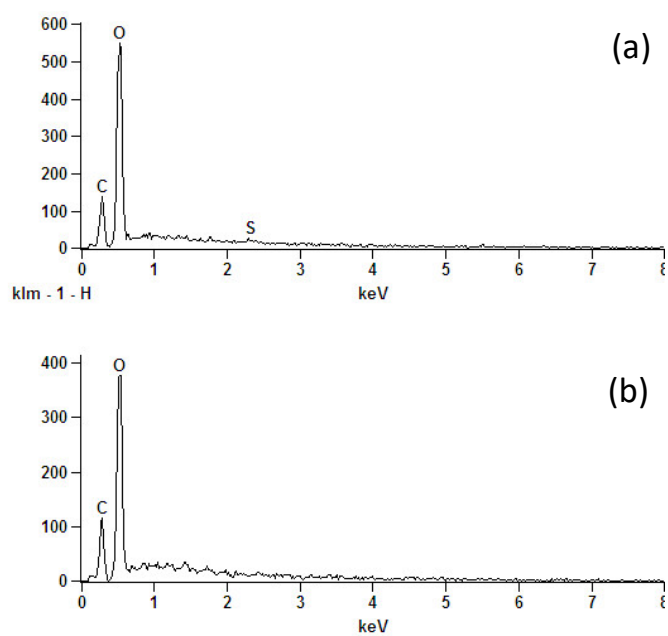

**Figure S1.** EDS images of (a) IIP-CH<sub>3</sub>Hg<sup>+</sup> and (b) NIP.

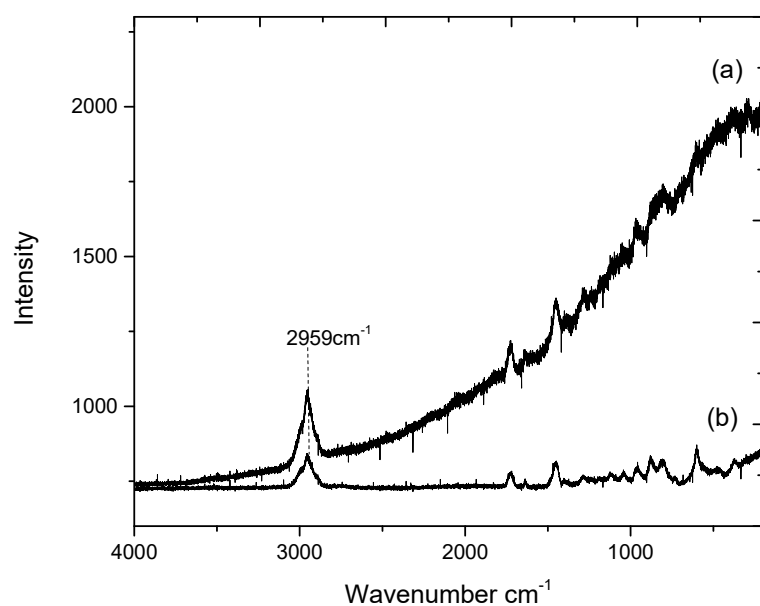

**Figure S2.** Raman spectrum of (a) IIP-  $\text{CH}_3\text{Hg}^+$  and (b) NIP.

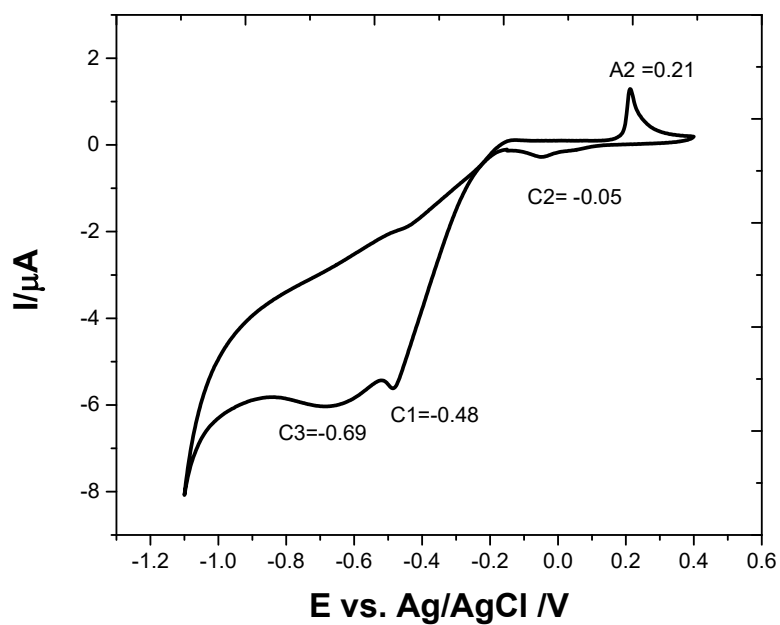

**Figure S3.** Cyclic voltammetry of CPE applied in a solution containing  $1000\text{ }\mu\text{g L}^{-1}$   $\text{CH}_3\text{Hg}^+$  and  $0.05\text{ mol L}^{-1}$   $\text{HCl}$ , recorded at  $0.1\text{ V s}^{-1}$

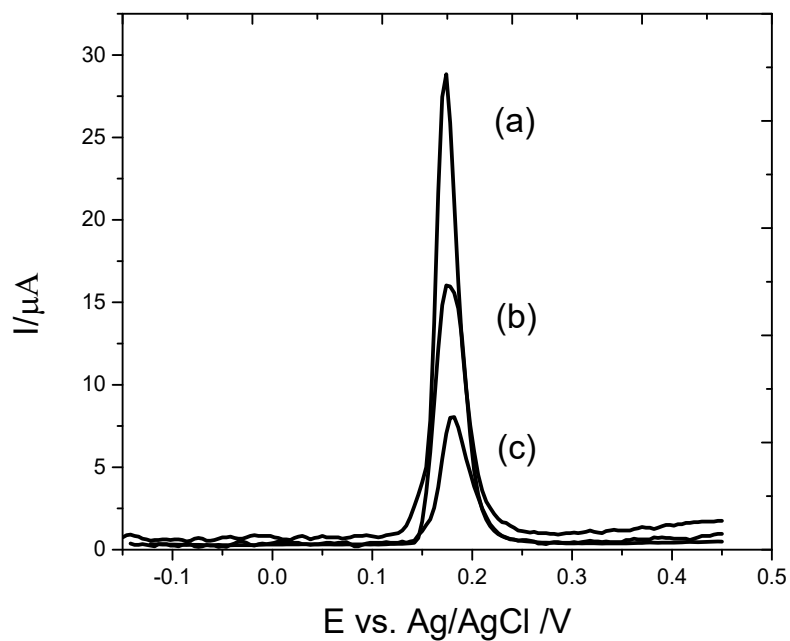

**Figure S4.** DPSV responses obtained from the application of  $1000\text{ }\mu\text{g L}^{-1}\text{ CH}_3\text{Hg}^+$  in  $0.05\text{ mol L}^{-1}\text{ HCl}$  solution for (a) CPE/MWCNTs/IIP-  $\text{CH}_3\text{Hg}^+$ , (b) CPE/MWCNTs/NIP and (c) CPE electrodes. Deposition potential:  $-0.8\text{ V}$  (vs. Ag/AgCl); deposition time: 500 s.

**Table S1.** Composition of working electrodes prepared in this work.

| Nomenclature                             | Composition                                                       |
|------------------------------------------|-------------------------------------------------------------------|
| CPE                                      | Graphite (100%)                                                   |
| CPE/IIP- $\text{CH}_3\text{Hg}^+$        | Graphite (80%), IIP- $\text{CH}_3\text{Hg}^+$ (20%)               |
| CPE/MWCNTs/IIP- $\text{CH}_3\text{Hg}^+$ | Graphite (70%), MWCNTs (10%), IIP- $\text{CH}_3\text{Hg}^+$ (20%) |
| CPE/MWCNTs/NIP                           | Graphite (70%), MWCNTs (10%), NIP (20%)                           |

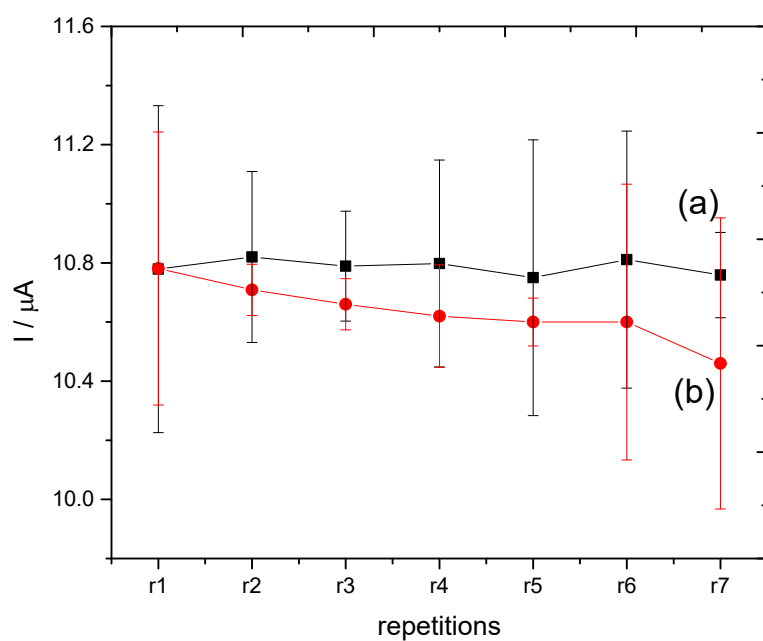

**Figure S5.** (a) Analysis of repeatability and (b) reusability of the proposed sensor using  $\text{CH}_3\text{Hg}^+$

**Table S2.** Estimation of the experimental RSD and Horwitz to evaluate the precision in terms of repeatability and reproducibility

|                                         | repeatability | reproducibility |
|-----------------------------------------|---------------|-----------------|
| $\% \text{RDS}_{\text{experimental}}^1$ | 0.981         | 1.981           |
| $\% \text{RDS}_{\text{Horwitz}}^2$      | 9.14          | 3.179           |

$$\% \text{RSD}_{\text{experimental}}^1 = (\text{standard deviation}) * 100 / \text{Mean}$$

$$\% \text{RSD}_{\text{Horwitz}}^2 = 2 (2^{1-0.5(\text{Log concentration})}) / 3$$
